# Supplementary material
Source: publisher figshare collection journal article supplement (https://frontiersin.figshare.com/ndownloader/files/26690894)

## **Inhibition and Induction by Poziotinib of Different Rat Cytochrome P450 Enzymes *In Vivo* and in an *In Vitro* Cocktail Method**

### **Supplementary Materials**

**Figure S1.** Chemical structure of (A) phenacetin, (B) bupropion, (C) tolbutamide, (D) dextromethorphan, (E) chlorzoxazone, (F) midazolam, and (G) diazepam (internal standard, IS).

**Figure S2.** Typical multiple reaction monitoring (MRM) chromatograms of (A) chlorzoxazone, (B) midazolam, (C) diazepam , (D) dextromethorphan, (E) tolbutamide, (F) bupropion, (G) phenacetin and (H) TIC in plasma samples.

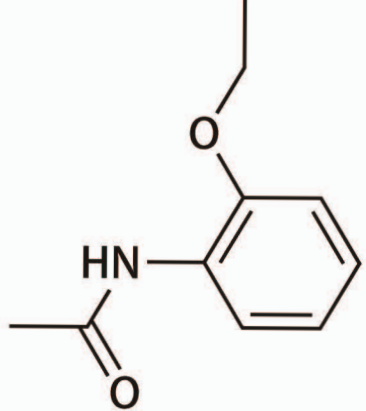

(A) Phenacetin

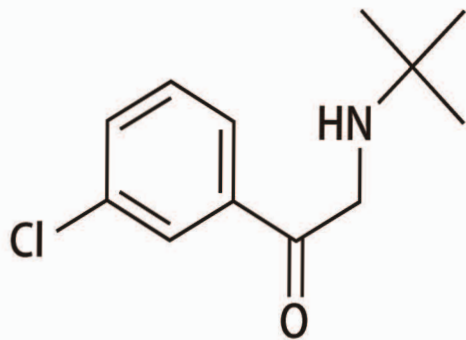

(B) Bupropion

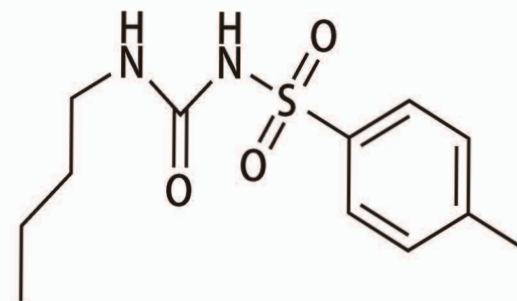

(C) Tolbutamide

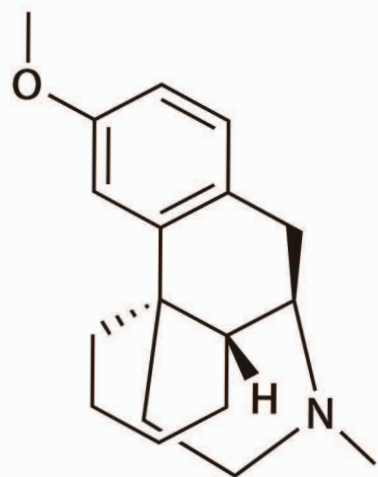

(D) Dextromethophan

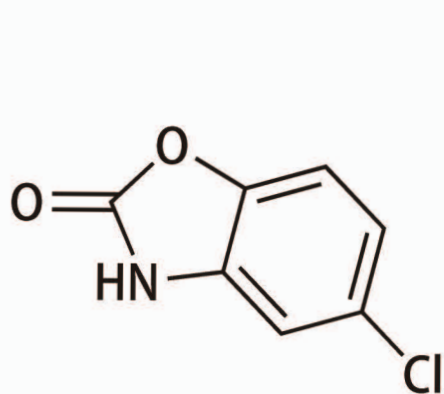

(E) Chlorzoxazone

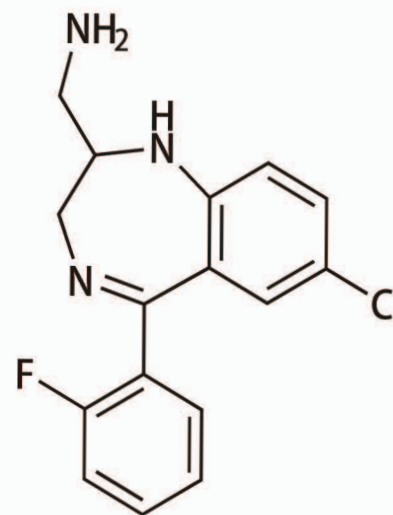

(F) Midazolam

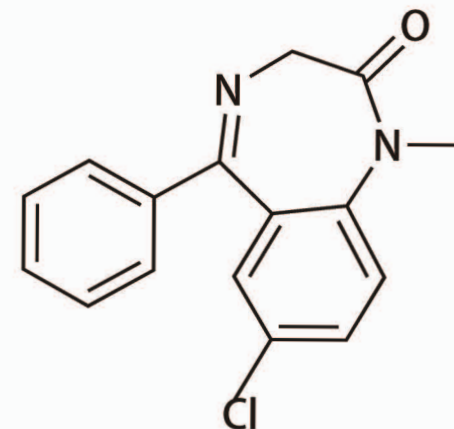

(G) Diazepam (IS)

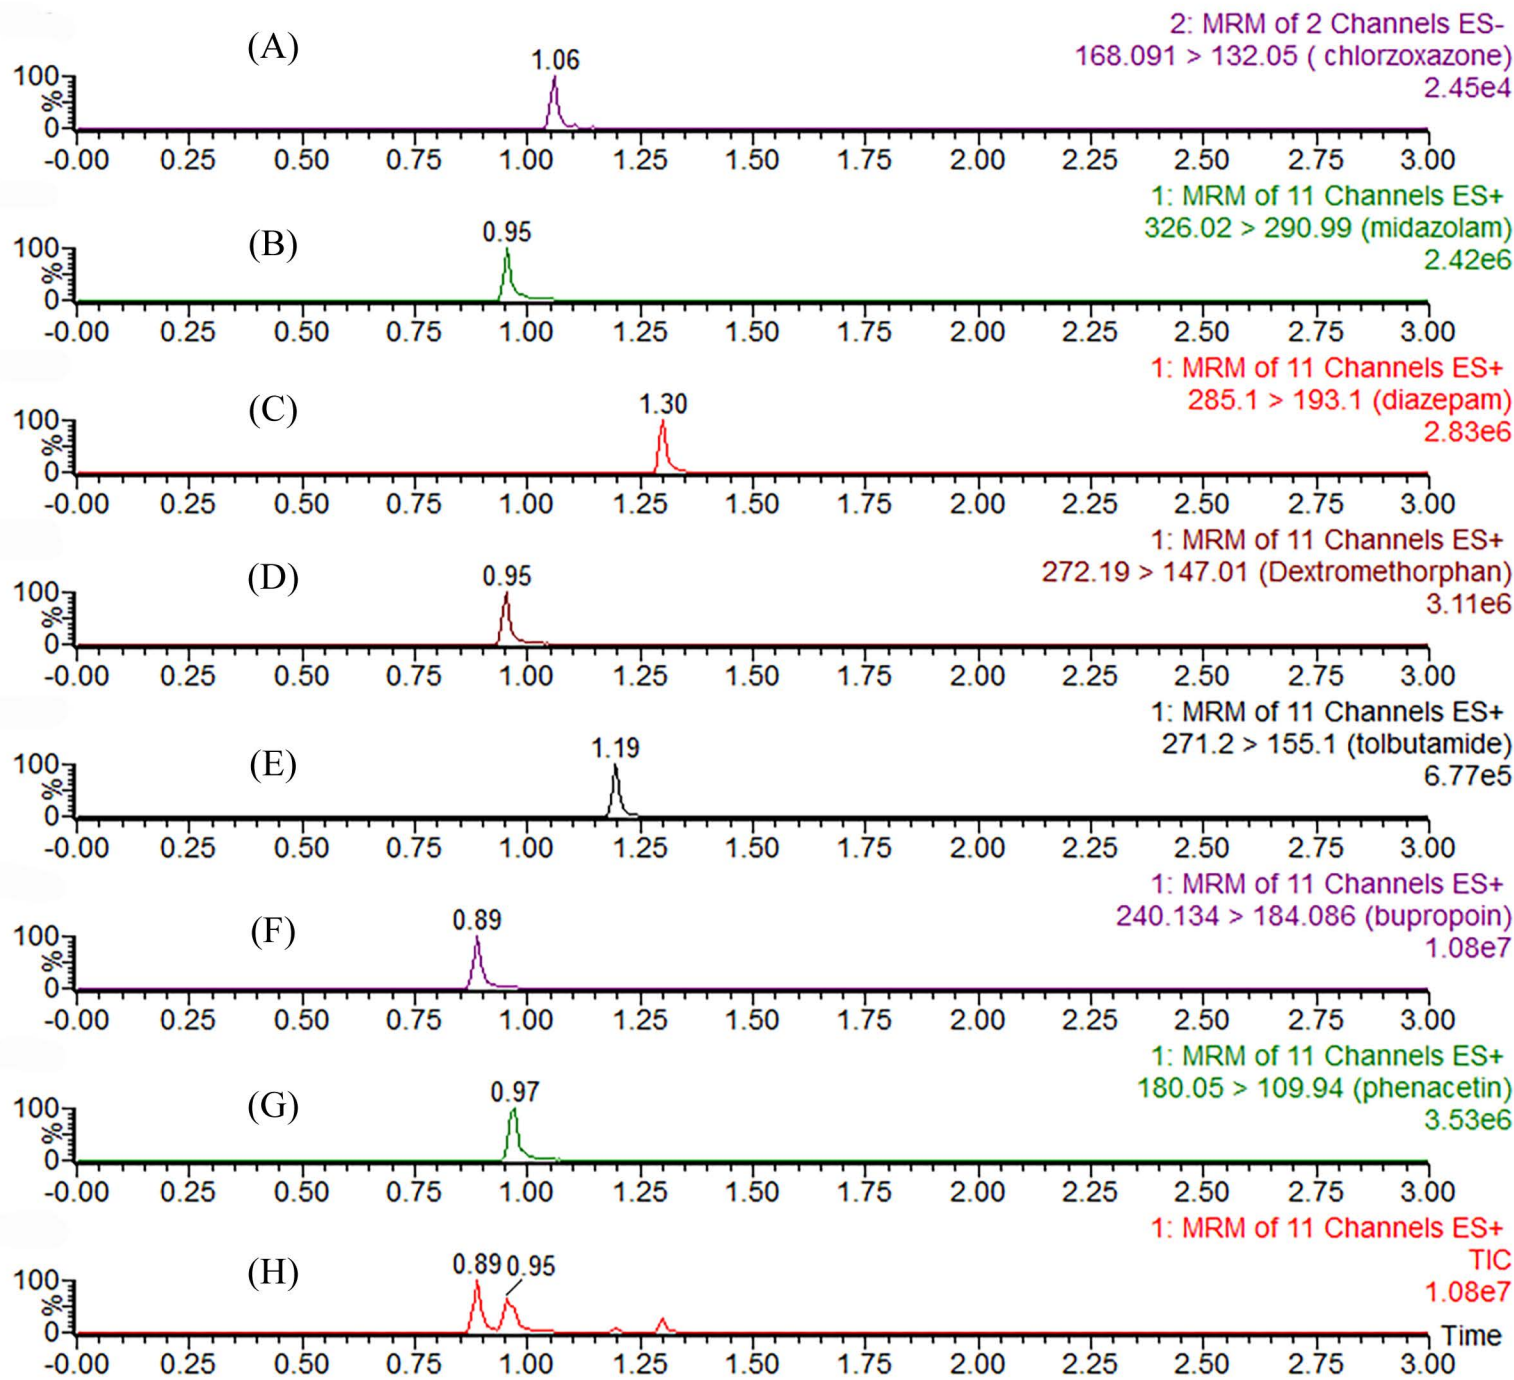

Supplement: Supplementary file [file 26690894]
